# Supplementary material
Source: Elsevier journal article supplement (https://www.sciencedirect.com/science/article/pii/S2531043722000307)
Supplement: mmc1 [file S2531043722000307:mmc1.docx]

**Supplementary Table 1** Oligonucleotides used for real-time PCR genotyping.

| Genetic variants  (normal/mutant) | Amplification primers  (forward/reverse) | Amplicon size (pb) | a Genotyping probes  (sensor/anchor) |
| --- | --- | --- | --- |
| no-S/S | ATGAAGCGTTTAGGCATGTT  TCCAGGAACTTGGTGATGATA | 170 | Cy5-GCACCTGG**A**AAATGAACTCAC-P  TTCCTGCCTGATGAGGGGAAACT-Flu |
| no-Z/Z | CGCTTCCTGGGAGGTGT  CAAAGGGTTTGTTGAACTTG | 201 | Cy5-GACCATCGAC**A**AGAAAGGG-P  CCAGGCCGTGCATAAGGCTGT-Flu |
| Phe52/ΔPhe52 | CTCTGTCTTGCAGGACAATG  GCCCTCCAGGATTTCATC | 326 | Cy5-CACCAATATC**TTC**TCCCCAG-P  CAGCTGGCACACCAGTCCAACA-Flu |
| T5/T617 | CGCTTCCTGGGAGGTGT  TGGGAGGGATTTACAGTCACA | 384 | GGCCATG**TTTTTT**AGAGGC-Flu  Cy5-CCCATGTCTATCCCCCCCGAG-P |

a The positions complementary to the non-S, Z, ΔPhe-52 or T6 variants in the sensor probes are highlighted in bold. The probes were labelled with the fluorescent compounds Cy5 or fluorescein (Flu), and blocked at the 3' end with a phosphate group (P) when necessary.
